# Supplementary material for: Antibacterial efficacy from NO-releasing MOF–polymer films
Source: Royal Society of Chemistry journal article supplement (doi:10.1039/d0ma00650e), 2020-01-01
Supplement: d0ma00650e1.pdf [file d0ma00650e1.pdf]

## Antibacterial Efficacy from NO-Releasing MOF-Polymer Films

Morven J Duncan<sup>1</sup>, Paul S Wheatley<sup>1</sup>, Emma M Coghill<sup>2</sup>, Simon M Vornholt<sup>1</sup>, Stewart J Warrender<sup>1\*</sup>, Ian L Megson<sup>2</sup>, Russell E Morris<sup>1</sup>

<sup>1</sup> School of Chemistry, University of St Andrews, North Haugh, St Andrews KY16 9ST, UK.

<sup>2</sup> Free Radical Research Facility, Division of Biomedical Sciences, University of the Highlands & Islands, Inverness, IV2 3JH, UK.

## Supporting Information

### Contents

**Figure S1:** Powder XRD of as-prepared CPO-27 (Ni) compared to the theoretical pattern.

**Figure S2:** TGA profile of as-prepared CPO-27 (Ni) powder.

**Figure S3:** Nitrogen adsorption/desorption isotherms for as-prepared CPO-27 (Ni) powder.

**Figure S4:** SEM images of as-prepared CPO-27 (Ni) powder.

**Figure S5:** X-ray diffraction patterns for polyurethane films containing 0 wt%, 1 wt%, 5 wt%, 10 wt% and 15 wt% CPO-27 (Ni).

**Figure S6:** Photograph of as-prepared, stand-alone CPO-27 (Ni)-containing polyurethane film.

**Table S1:** Numerical data from NO adsorption, storage and release analyses of films containing 1 wt%, 5 wt%, 10 wt% and 15 wt% CPO-27 (Ni).

**Table S2:** Numerical data from antibacterial assay against *E. coli*.

**Table S3:** Numerical data from antibacterial assay against *S. aureus*.

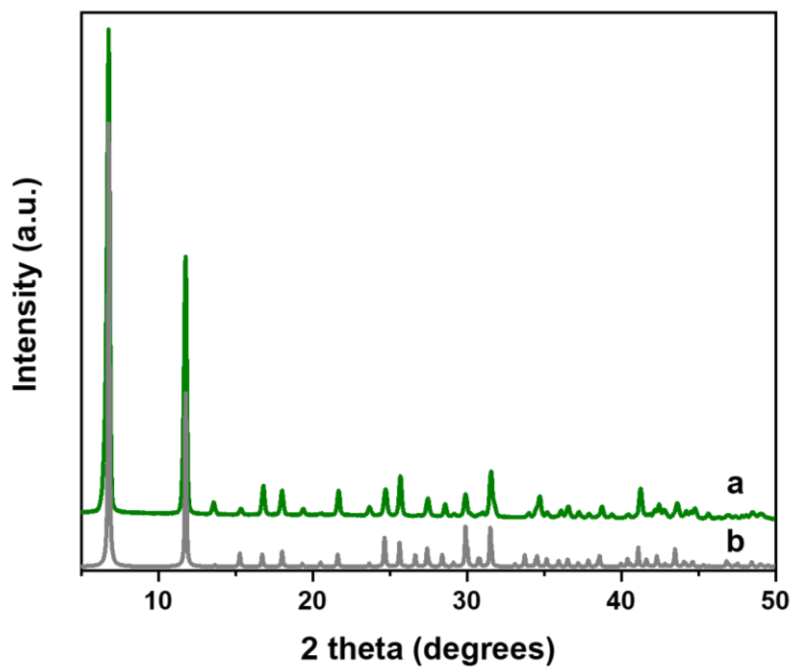

**Figure S1:** Powder XRD of as-prepared CPO-27 (Ni) (a), compared to the theoretical pattern for the same material (b).

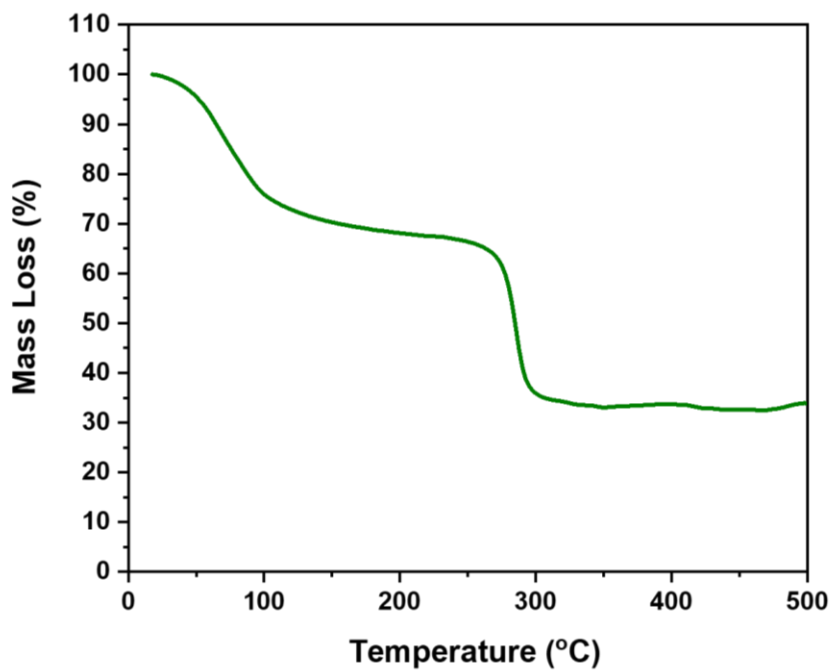

**Figure S2:** TGA profile of as-prepared CPO-27 (Ni) powder.

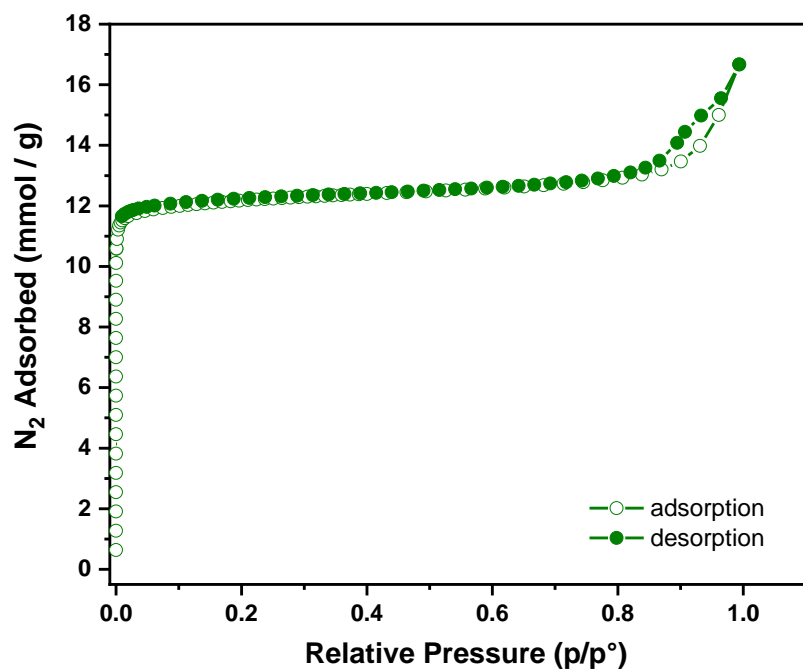

**Figure S3:** Nitrogen adsorption/desorption isotherms for as-prepared CPO-27 (Ni) powder.

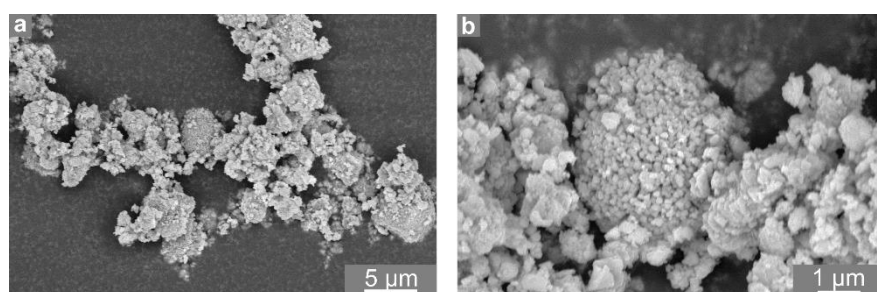

**Figure S4:** SEM images of as-prepared CPO-27 (Ni) powder.

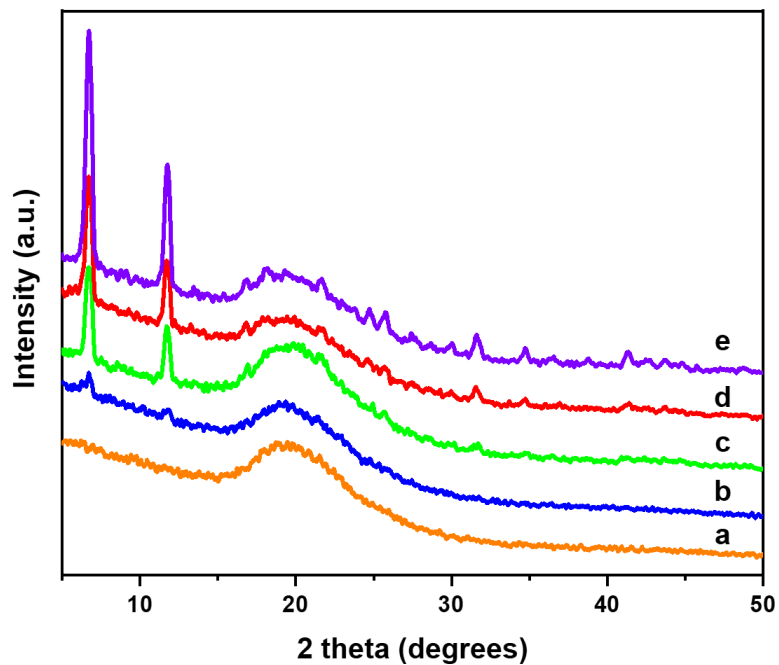

**Figure S5:** X-ray diffraction patterns for polyurethane films containing 0 wt% (a), 1 wt% (b), 5 wt% (c), 10 wt% (d) and 15 wt% (e) CPO-27 (Ni).

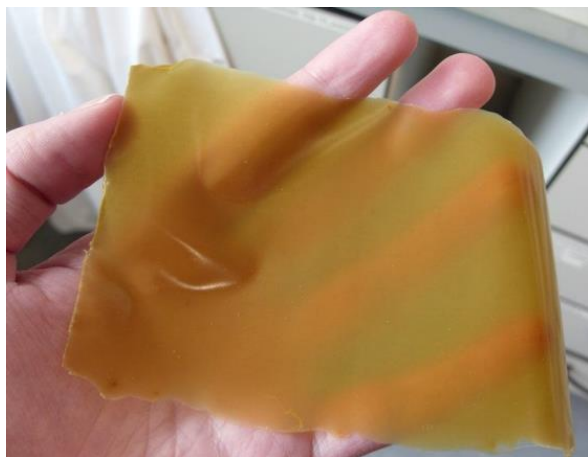

**Figure S6:** Photograph of as-prepared, stand-alone CPO-27 (Ni)-containing polyurethane film.

**Table S1:** Numerical data from NO adsorption, storage and release analyses of films containing 1 wt%, 5 wt%, 10 wt% and 15 wt% CPO-27 (Ni).

| CPO-27 (Ni) Loading (wt%) | NO Adsorbed          | NO Stored | Total NO Released | NO Adsorbed         | NO Stored | Total NO Released |
|---------------------------|----------------------|-----------|-------------------|---------------------|-----------|-------------------|
|                           | (mmol NO per g film) |           |                   | (mmol NO per g MOF) |           |                   |
| 1                         | 0.03                 | 0.03      | 0.01              | 3.29                | 2.98      | 1.04              |
| 5                         | 0.16                 | 0.16      | 0.08              | 3.24                | 3.13      | 1.62              |
| 10                        | 0.31                 | 0.30      | 0.29              | 3.10                | 2.98      | 2.94              |
| 15                        | 0.54                 | 0.53      | 0.49              | 3.61                | 3.53      | 3.30              |

**Table S2:** Numerical data from antibacterial assay against *E. coli*. Mean colony forming units (N) and associated standard deviations (s.d.) were calculated from six replicate experiments.

|          | Hours contact | Mean N value (bacteria cfu/cm <sup>2</sup> ) | N value s.d. (bacteria cfu/cm <sup>2</sup> ) | Log <sub>10</sub> N | Log reduction (R) |
|----------|---------------|----------------------------------------------|----------------------------------------------|---------------------|-------------------|
| CONTROL  | 0             | 36354.17                                     | 2762.28                                      | 4.56                | -                 |
|          | 1             | 27583.33                                     | 6984.83                                      | 4.44                | 0.12              |
|          | 5             | 6395.83                                      | 3977.86                                      | 3.81                | 0.75              |
| 1.0% NO  | 0             | 43916.67                                     | 3459.72                                      | 4.64                | -                 |
|          | 1             | 20479.17                                     | 6803.62                                      | 4.31                | 0.33              |
|          | 5             | <2.5                                         | 0                                            | <0.40               | >4.24             |
| CONTROL  | 0             | 36354.17                                     | 2762.28                                      | 4.56                | -                 |
|          | 1             | 27583.33                                     | 6984.83                                      | 4.44                | 0.12              |
|          | 5             | 6395.83                                      | 3977.86                                      | 3.81                | 0.75              |
| 5.0% NO  | 0             | 31875                                        | 4382.95                                      | 4.5                 | -                 |
|          | 1             | <2.5                                         | 0                                            | <0.40               | >4.11             |
|          | 5             | <2.5                                         | 0                                            | <0.40               | >4.11             |
| CONTROL  | 0             | 42729.17                                     | 2294.9                                       | 4.63                | -                 |
|          | 1             | 31645.83                                     | 3962.12                                      | 4.50                | 0.13              |
|          | 5             | 12708.33                                     | 4222.28                                      | 4.10                | 0.53              |
| 10.0% NO | 0             | 42500                                        | 3493.5                                       | 4.63                | -                 |
|          | 1             | <2.5                                         | 0                                            | <0.40               | 4.23              |
|          | 5             | <2.5                                         | 0                                            | <0.40               | 4.23              |
| CONTROL  | 0             | 36416.67                                     | 4047.07                                      | 4.56                | -                 |
|          | 1             | 20645.83                                     | 10670.93                                     | 4.31                | 0.25              |
|          | 5             | 272.92                                       | 3336.20                                      | 2.44                | 2.13              |
| 15.0% NO | 0             | 40437.5                                      | 5655.98                                      | 4.61                | -                 |
|          | 1             | <2.5                                         | 0                                            | <0.40               | >4.21             |
|          | 5             | <2.5                                         | 0                                            | <0.40               | >4.21             |

**Table S3:** Numerical data from antibacterial assay against *S. aureus*. Mean colony forming units (N) and associated standard deviations (s.d.) were calculated from six replicate experiments.

|          | Hours Contact | Mean N value (bacteria cfu/cm <sup>2</sup> ) | N value s.d. (bacteria cfu/cm <sup>2</sup> ) | Log <sub>10</sub> N | Log reduction (R) |
|----------|---------------|----------------------------------------------|----------------------------------------------|---------------------|-------------------|
| CONTROL  | 0             | 31541.67                                     | 2681.66                                      | 4.5                 | -                 |
|          | 1             | 24000.00                                     | 5828.03                                      | 4.38                | 0.12              |
|          | 5             | 1477.08                                      | 22675.69                                     | 3.17                | 1.33              |
| 1.0% NO  | 0             | 29479.17                                     | 5061.51                                      | 4.47                | -                 |
|          | 1             | 12791.67                                     | 3989.81                                      | 4.11                | 0.36              |
|          | 5             | <2.5                                         | 0                                            | <0.40               | >4.07             |
| CONTROL  | 0             | 31541.67                                     | 2681.66                                      | 4.5                 | -                 |
|          | 1             | 24000.00                                     | 5828.03                                      | 4.38                | 0.12              |
|          | 5             | 1477.08                                      | 22675.69                                     | 3.17                | 1.33              |
| 5.0% NO  | 0             | 29895.83                                     | 1929.02                                      | 4.48                | -                 |
|          | 1             | 49.79                                        | 110.55                                       | 1.7                 | 2.78              |
|          | 5             | <2.5                                         | 0                                            | <0.40               | >4.08             |
| CONTROL  | 0             | 11854.17                                     | 3154.11                                      | 4.07                | -                 |
|          | 1             | 7895.83                                      | 1057.75                                      | 3.90                | 0.18              |
|          | 5             | 8.54                                         | 9.74                                         | 0.93                | 3.14              |
| 10.0% NO | 0             | 12604.17                                     | 1794.75                                      | 4.1                 | -                 |
|          | 1             | <2.5                                         | 0                                            | <0.40               | >3.70             |
|          | 5             | <2.5                                         | 0                                            | <0.40               | >3.70             |
| CONTROL  | 0             | 33541.67                                     | 2999.68                                      | 4.53                | -                 |
|          | 1             | 16041.67                                     | 5680.74                                      | 4.21                | 0.32              |
|          | 5             | 4252.08                                      | 5664.01                                      | 3.63                | 0.90              |
| 15.0% NO | 0             | 29083.33                                     | 1816.38                                      | 4.46                | -                 |
|          | 1             | <2.5                                         | 0                                            | <0.40               | >4.07             |
|          | 5             | <2.5                                         | 0                                            | <0.40               | >4.07             |
